# Supplementary material for: Enhanced thermal stability of inverted perovskite solar cells by interface modification and additive strategy
Source: Royal Society of Chemistry journal article supplement (doi:10.1039/d0ra03238g), 2020-01-01
Supplement: d0ra03238g1.pdf [file d0ra03238g1.pdf]

## Supporting information

### Enhanced thermal stability of inverted perovskite solar cells by interface modification and additive strategy

Xueqing Zheng,<sup>1,a)</sup> Tingming Jiang,<sup>2,a)</sup> Lizhong Bai,<sup>2</sup> Xu Chen,<sup>2</sup> Zeng Chen,<sup>2</sup> Xuehui Xu,<sup>2</sup> Tianyu Liu,<sup>2</sup> Yizhi Liu,<sup>1</sup> Dongdong Song,<sup>1</sup> Xiaojian Xu,<sup>1</sup> Bo Li,<sup>\*,1</sup> and Yang (Michael) Yang<sup>\*,2</sup>

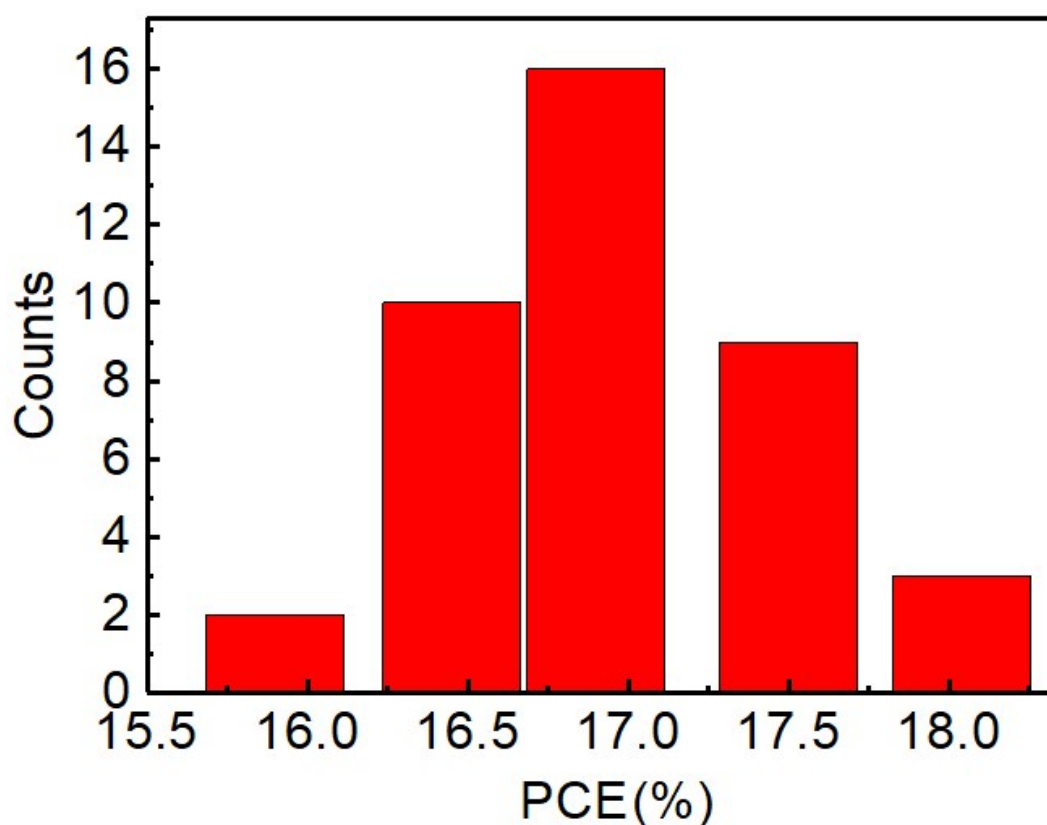

**Fig S1**, Histograms of PCEs of standard device with BCP layer (5 nm) and C<sub>60</sub> layer (25 nm), and device over 40 cells.

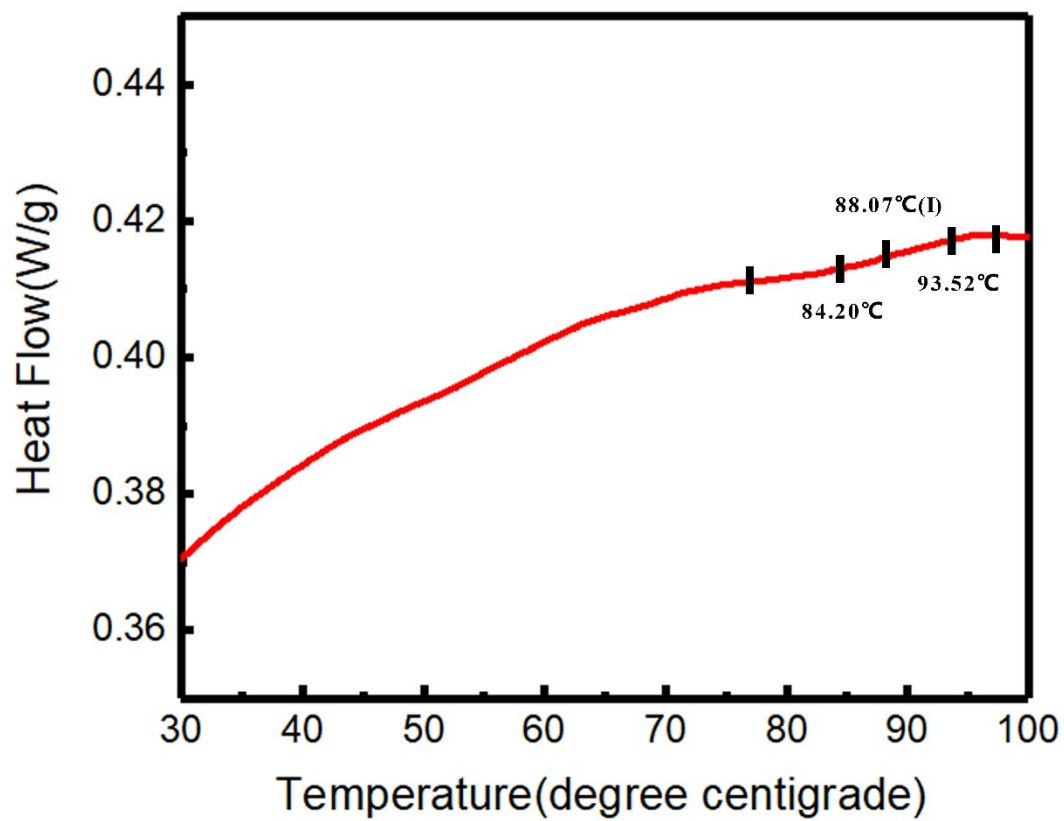

Fig S2, Differential Scanning Calorimetry (DSC) thermograph of BCP powder

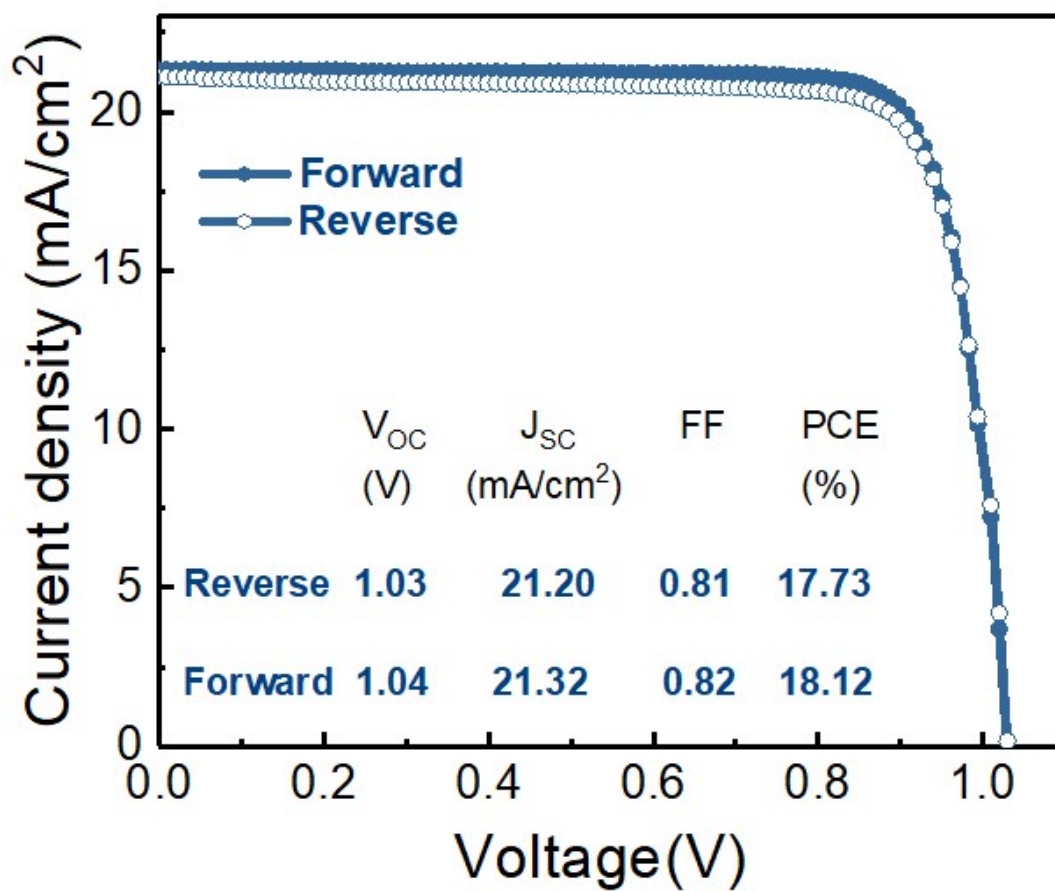

**Fig S3** , J-V curves of the best-performing device under forward and reverse scans with photovoltaic parameters inserted, respectively.

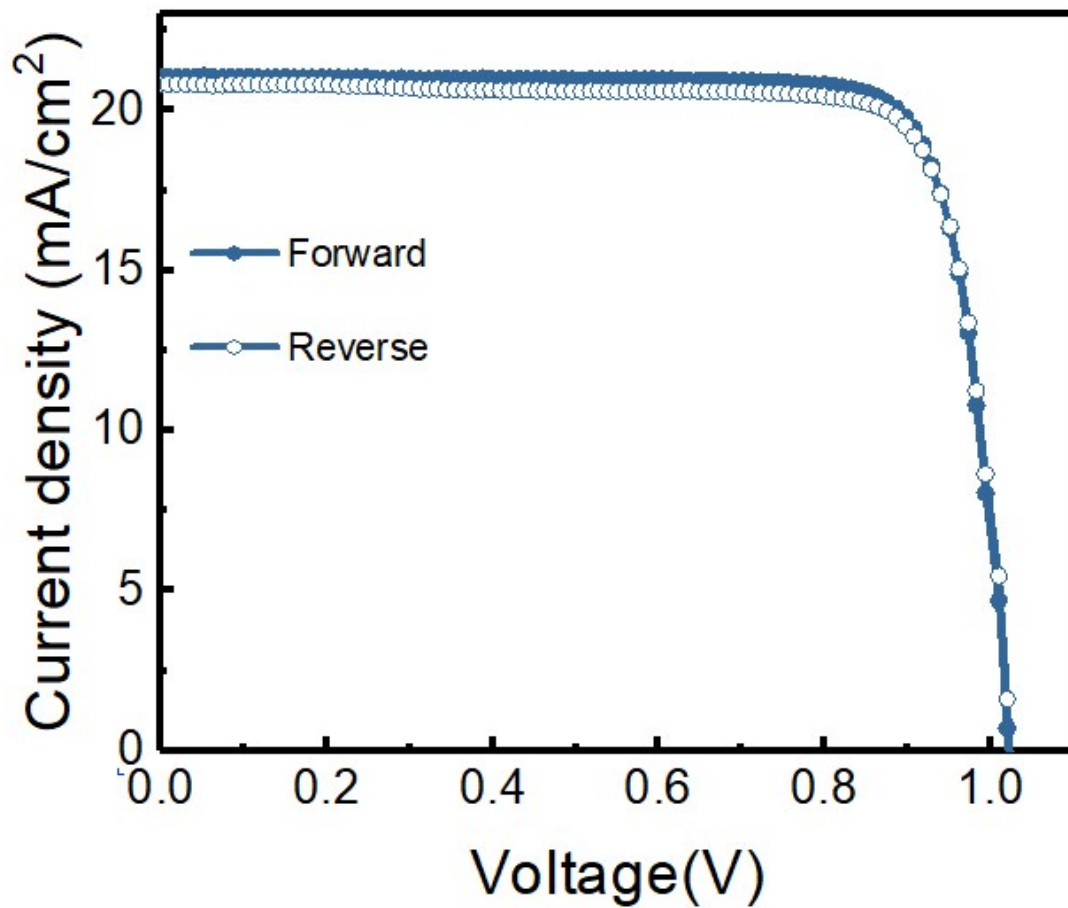

**Fig S4**, J-V curves of device with 0.4% BMIMBF<sub>4</sub> under forward and reverse scans with photovoltaic parameters inserted, respectively.

(a)

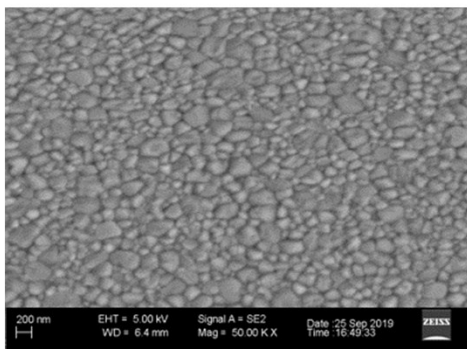

(b)

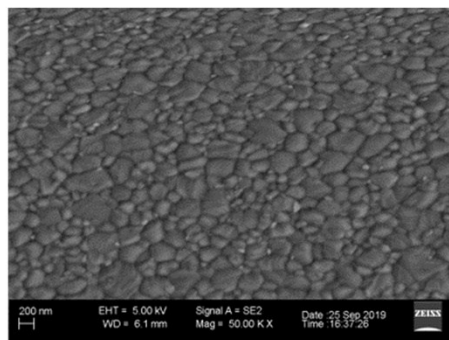

(c)

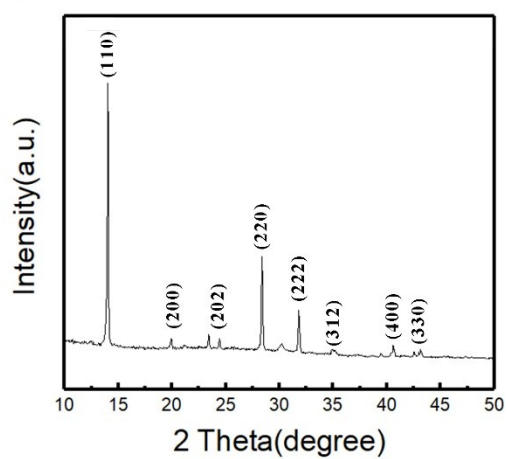

(d)

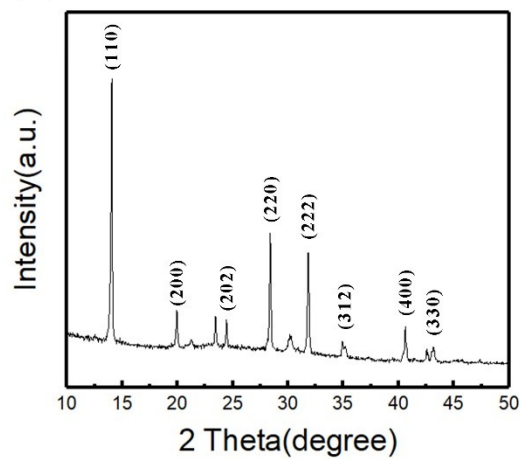

**Fig S5**, (a) SEM image of MAPbI<sub>3</sub>; (b) SEM image of MAPbI<sub>3</sub> with BMIMBF<sub>4</sub>; (c) XRD patterns of MAPbI<sub>3</sub>; (d) XRD patterns of MAPbI<sub>3</sub> with BMIMBF<sub>4</sub>.
